1 **Title**

2 *De novo* assembly and annotation of the eastern fence lizard (*Sceloporus*  
3 *undulatus*) transcriptome

4

5 **Authors**

6 Mariana B. Grizante<sup>1</sup>, Marc Tollis<sup>1,2</sup>, Juan J. Rodriguez<sup>1</sup>, Ofir Levy<sup>1</sup>, Michael J.  
7 Angilletta Jr.<sup>1</sup>, Kenro Kusumi<sup>1</sup>

8

9 **\*Corresponding authors**

10 Mariana Grizante: [mari.grizante@gmail.com](mailto:mari.grizante@gmail.com)

11 Kenro Kusumi: [Kenro.Kusumi@asu.edu](mailto:Kenro.Kusumi@asu.edu)

12

13 **Authors' emails**

14 mari.grizante@gmail.com, mtollis@asu.edu, j.rodriguez1214@gmail.com,

15 levyofi@gmail.com, ma@asu.edu, Kenro.Kusumi@asu.edu

16

17 **Affiliations**

18 <sup>1</sup>School of Life Sciences, Arizona State University, PO Box 874501, Tempe, AZ  
19 85287, USA.

20 <sup>2</sup>Biodesign Institute, Arizona State University, PO Box 8724501, Tempe, AZ  
21 85287, USA.

22 **Abstract**

23 **Background:** The eastern fence lizard (*Sceloporus undulatus*) has been a model  
24 species for ecological and evolutionary research. Genomic and transcriptomic  
25 resources for this species would promote investigation of genetic mechanisms  
26 that underpin plastic responses to environmental stress, such as climate  
27 warming. Moreover, such resources would aid comparative studies of complex  
28 traits at the molecular level, such as the transition from oviparous to viviparous  
29 reproduction, which happened at least four times within *Sceloporus*.

30 **Findings:** A *de novo* transcriptome assembly for *Sceloporus undulatus*,  
31 Sund\_v1.0, was generated using over 179 million Illumina reads obtained from  
32 three tissues (whole brain, skeletal muscle, and embryo) as well as previously  
33 reported liver sequences. The Sund\_v1.0 assembly had an average contig length  
34 of 782 nucleotides and an E90N50 statistic of 2,550 nucleotides. Comparing *S.*  
35 *undulatus* transcripts with the benchmarking universal single-copy orthologs  
36 (BUSCO) for tetrapod species yielded 97.2% gene representation. A total of  
37 13,422 protein-coding orthologs were identified in comparison to the genome of  
38 the green anole lizard, *Anolis carolinensis*, which is the closest related species  
39 with genomic data available.

40 **Conclusions:** The multi-tissue transcriptome of *S. undulatus* is the first for a  
41 member of the family Phrynosomatidae, offering an important resource to  
42 advance studies of adaptation in this species and genomic research in reptiles.

43

44 **Keywords:** *Sceloporus undulatus*, eastern fence lizard, Phrynosomatidae, RNA-  
45 Seq, transcriptome, assembly, annotation.

46

## 47 **Data description**

### 48 **Context**

49 Eastern fence lizards belong to a clade, the *Sceloporus undulatus* complex,  
50 which spans much of the United States and northern Mexico [1]. Because these  
51 lizards occupy a wide range of habitats and environmental conditions, *S.*  
52 *undulatus* has been a good model for studies of organismal ecology [2–4],  
53 population dynamics [5,6], and local adaptation [7–9]. In particular, embryos of  
54 oviparous *S. undulatus* are subjected to oscillations in nest temperature that are  
55 known to affect development [10–13], which could potentially be compensated  
56 for by egg-laying behavior in adult females [14,15]. Embryos of this species have  
57 a threshold for thermal tolerance at high temperatures and are thus susceptible  
58 to potential warming due to climate change [11,16]. Other species in the genus  
59 *Sceloporus* evolved either prolonged or complete retention of eggs in response  
60 to cold environments. In fact, viviparity has evolved in association with cooler  
61 climates at least four times within *Sceloporus* and another two times in the  
62 Phrynosomatidae [17], along with numerous physiological and morphological  
63 adaptations expected to accompany this convergent trait. Specifically, a  
64 congeneric species (*S. jarrovi*) displays specialized features in the placenta,  
65 although relying mostly on yolk nutrients during development (lecithotrophy)  
66 [18,19]. A comparative study of gene expression among *Sceloporus* species that

67 differ in parity mode (oviparous vs. viviparous) would allow testing for  
68 convergence with the pregnant-specific gene expression profile described for  
69 viviparous lizard species from family Scincidae, whose development depend  
70 mostly on nutrients from the mother (matrotrophy) [20]. To begin to identify the  
71 genes for molecular studies of these processes, we have sequenced and  
72 annotated a *de novo* multi-tissue transcriptome for *Sceloporus undulatus*.

73

## 74 **Methods**

### 75 *a) Sampling*

76 Gravid females of *Sceloporus undulatus* were collected in Edgefield County,  
77 South Carolina (33.7°N, 82.0°W) and transported to Arizona State University.  
78 These animals were maintained under conditions described in previous  
79 publications [21,22], which were approved by the Institutional Animal Care and  
80 Use Committee (Protocol #14-1338R). Approximately two days after laying eggs,  
81 each lizard was euthanized by injecting sodium pentobarbital into the coelomic  
82 cavity. The whole brain and skeletal muscle samples were removed and placed  
83 in RNA-lysis buffer (mirVana miRNA Isolation Kit, Ambion) and flash-frozen.  
84 Additionally, three early-stage embryos from each clutch were dissected, pooled  
85 together, and homogenized in RNA-lysis buffer using the same protocol.

### 86 *b) Sequencing*

87 Total RNA was isolated from three tissue samples (whole brain, skeletal muscle  
88 and embryos) from each individual using the mirVana miRNA Isolation Kit

89 (Ambion) protocol. Samples were checked for quality on a 2100 Bioanalyzer  
90 (Agilent). One sample from each tissue was selected for RNA-Seq based on the  
91 highest RIN, with a cutoff of 8.0. For each selected sample, 3 µg of total RNA  
92 was sent to the University of Arizona Genetics Core (Tucson, AZ) for library  
93 preparation and with TruSeq v3 chemistry for a standard insert size. RNA  
94 samples were multiplexed and sequenced using an Illumina HiSeq 2000 to  
95 generate 100-bp paired-end reads. Publicly available raw Illumina RNA-Seq  
96 reads from *S. undulatus* liver [23] were added to our dataset. After removing  
97 adaptors, raw reads from the four tissues were evaluated using FastQC  
98 (<http://www.bioinformatics.babraham.ac.uk/projects/fastqc/>, v-0.11.5) and  
99 trimmed using Trimmomatic (v-0.32, [24]), filtering for quality score ( $\geq Q20$ ) and  
100 using HEADCROP:9 to minimize nucleotide bias. This procedure yielded  
101 179,374,469 quality-filtered reads. **Table 1** summarizes read-pair counts from  
102 whole brain, skeletal muscle, whole embryos, and liver.

### 103 *c) Assembly and annotation*

104 All trimmed reads were pooled and assembled *de novo* using Trinity (v-2.2.0,  
105 default k-mer size of 25 [25]), which is an efficient transcriptome assembly  
106 method for non-model species without a reference genome available [26]. The  
107 most comprehensive transcriptome, obtained using reads from four tissues,  
108 consists of 547,370 contigs with an average length of 781.5 nucleotides (**Table**  
109 **2**)—shorter than other assemblies because of the range of contig sizes that  
110 varied among datasets (1, 3 and 4 tissues; **Table S1, Fig. S1**). The N50 of the  
111 most highly expressed transcripts that represent 90% of the total normalized

112 expression data (E90N50) was highest in the assembly based on four tissues,  
113 hereafter referred to as Sund\_v1.0 (**Table 2**). A subset of contigs containing the  
114 longest open reading frames (ORFs), representing 123,323 transcripts, was  
115 extracted from the Sund\_v1.0 assembly using TransDecoder (v-3.0.0,  
116 <http://transdecoder.github.io>) with homology searches against the databases  
117 UniProtKB/SwissProt [27] and PFAM [28]. The transcriptome obtained was  
118 annotated using Trinotate (v-3.0, <http://trinotate.github.io>), which involved  
119 searching against multiple databases (as UniProtKB/SwissProt, PFAM, signalP,  
120 GO) to identify sequence homology and protein domains, as well as to predict  
121 signaling peptides. **Table 3** summarizes the annotation results.

122

### 123 ***Data validation and quality control***

124 Trimmed reads were aligned back to the assembled contigs using Bowtie2 (v-  
125 2.2.6 [29]). From the 176,086,787 reads that aligned, 97% represented proper  
126 pairs (**Table S2**), indicating good read representation in the Sund\_v1.0  
127 assembly. To assess quality and completeness of the assemblies, we first  
128 compared the Sund\_v1.0 transcripts with the BUSCO profile for Tetrapoda  
129 (BUSCO v-2.0 [30]), which has BLAST+ (v-2.2.31 [31]) and HMMER (v-3.1b2  
130 [32]) as dependencies. This procedure revealed that the Sund\_v1.0 assembly  
131 captured 97.1% of the expected orthologs, a result comparable to the 97.8%  
132 obtained for *Anolis carolinensis* transcriptome using 14 tissues [33] (**Table 4**).  
133 Next, nucleotide sequences of Sund\_v1.0 transcripts with the longest ORFs were

134 compared to the protein set of *Anolis carolinensis* (AnoCar2.0, Ensembl) using  
135 BLASTX (evalue=1e-20, max\_target\_seqs=1). This comparison showed that  
136 11,223 transcripts of *S. undulatus* have nearly full-length (>80%) alignment  
137 coverage with *A. carolinensis* proteins (**Table S3**). Predicted proteins of *S.*  
138 *undulatus* were also used to identify 13,422 one-to-one orthologs with proteins of  
139 *A. carolinensis* through reciprocal BLAST (evalue=1e-6, max\_target\_seqs=1).

140

#### 141 **Availability of supporting data**

142 Novel RNA-Seq data for *Sceloporus undulatus* samples are available under the  
143 NCBI accession identifiers listed in Table 1, and are associated with BioProject  
144 PRJNA371829. RNA-Seq data for the liver sample [23] were downloaded from  
145 NCBI from BioProject PRJNA183121, Run SRR629640. Datasets referring to the  
146 assembled and annotated transcriptome are available for download at Dryad.

147

148

149

150 *List of abbreviations*

151 BLAST: Basic local alignment search tool; BUSCO: Benchmarking Universal  
152 Single-Copy Orthologs; GO: Gene Ontology; National Center for Biotechnology  
153 Information NCBI; ORFs: open reading frames; RIN: RNA integrity number.

154

155 **Competing interests**

156 The authors declare that they have no competing interests.

157

158 **Funding**

159 This work was funded by a Grant for Post Doctoral Interdisciplinary Research in  
160 the Life Sciences from the School of Life Sciences at Arizona State University  
161 awarded to MT and OL, funding from the College of Liberal Arts and Sciences at  
162 Arizona State University to KK, and a post-doctoral fellowship from the Conselho  
163 Nacional de Desenvolvimento Científico e Tecnológico (CNPq; 201369/2014-1)  
164 awarded to MBG.

165

166 **Authors' contributions**

167 MBG performed transcript assemblies and bioinformatics analyses; JJR  
168 performed transcript assemblies and bioinformatics analyses; MAT, OL, MJA and  
169 KK conceived the study; MAT and KK supervised bioinformatics analyses; MJA  
170 and OL provided samples. MBG drafted the manuscript, with edits from MT, KK,  
171 and MJA. All authors read and approved the final version.

172



173 **Acknowledgements**

174 We thank Michael W. Sears and Colton D. Smith for collecting specimens and  
175 John Cornelius, Greer Dolby, Shawn Rupp, Timothy Webster and Cindy Xu for  
176 helpful discussions.

177

178 **References**

- 179 1. Leaché AD. Species tree discordance traces to phylogeographic clade boundaries in  
180 north American Fence lizards (*Sceloporus*). *Syst. Biol.* 2009;58:547–59.
- 181 2. Angilletta MJ. Thermal and physiological constraints on energy assimilation in a  
182 widespread lizard (*Sceloporus undulatus*). *Ecology.* 2001;82:3044–56.
- 183 3. Adolph SC, Porter WP. Temperature, activity, and lizard life histories. *Am. Nat.*  
184 1993;142:273–95.
- 185 4. Niewiarowski PH. Energy budgets, growth rates, and thermal constraints: toward an  
186 integrative approach to the study of life-history variation. *Am. Nat.* 2001;157:421–33.
- 187 5. Tinkle DW, Ballinger RE. *Sceloporus undulatus*: A study of the intraspecific  
188 comparative demography of a lizard. *Ecology.* 1972;53:570–84.
- 189 6. Niewiarowski PH. Understanding geographic life history variation in lizards. In: Pianka  
190 ER, Vitt LJ, editors. *Lizard Ecol. Hist. Exp. Perspect.* Princeton: Princeton University  
191 Press; 1994. p. 31–49.
- 192 7. Oufiero CE, Angilletta Michael J J. Convergent evolution of embryonic growth and  
193 development in the eastern fence lizard (*Sceloporus undulatus*). *Evolution (N. Y.)*.  
194 2006;60:1066–75.
- 195 8. Angilletta MJ, Niewiarowski PH, Dunham AE, Leache AD, Porter WP. Bergmann's  
196 clines in ectotherms: Illustrating a life-history perspective with sceloporine lizards. *Am.*  
197 *Nat.* 2004;164:E168–83.

- 198 9. Angilletta MJ, Oufiero CE, Leaché AD. Direct and indirect effects of environmental  
199 temperature on the evolution of reproductive strategies: an information theoretic  
200 approach. *Am. Nat.* 2006;168:E123–35.
- 201 10. Levy O, Buckley LB, Keitt TH, Smith CD, Boateng KO, Kumar DS, et al. Resolving  
202 the life cycle alters expected impacts of climate change. *Proc. R. Soc. B Biol. Sci.*  
203 2015;282.
- 204 11. Angilletta MJ, Zelic MH, Adrian GJ, Hurliman AM, Smith CD. Heat tolerance during  
205 embryonic development has not diverged among populations of a widespread species  
206 (*Sceloporus undulatus*). *Conserv. Physiol.* 2013;1:1–9.
- 207 12. Parker SL, Andrews RM. Incubation temperature and phenotypic traits of *Sceloporus*  
208 *undulatus*: Implications for the northern limits of distribution. *Oecologia.* 2007;151:218–  
209 31.
- 210 13. Angilletta MJ, Winters RS, Dunham AE. Thermal effects on the energetics of lizard  
211 embryos: Implications for hatchling phenotypes. *Ecology.* 2000;81:2957–68.
- 212 14. Angilletta MJ, Hill T, Robson MA. Is physiological performance optimized by  
213 thermoregulatory behavior?: A case study of the eastern fence lizard, *Sceloporus*  
214 *undulatus*. *J. Therm. Biol.* 2002;27:199–204.
- 215 15. Buckley LB, Ehrenberger JC, Angilletta MJ. Thermoregulatory behaviour limits local  
216 adaptation of thermal niches and confers sensitivity to climate change. *Funct. Ecol.*  
217 2015;29:1038–47.
- 218 16. Telemeco RS, Fletcher B, Levy O, Riley A, Rodriguez-Sanchez Y, Smith C, et al.  
219 Lizards fail to plastically adjust nesting behavior or thermal tolerance as needed to buffer  
220 populations from climate warming. *Glob. Chang. Biol.* 2016;1–10.
- 221 17. Lambert SM, Wiens JJ. Evolution of viviparity: A phylogenetic test of the cold-climate  
222 hypothesis in phrynosomatid lizards. *Evolution (N. Y.)*. 2013;67:2614–30.
- 223 18. Blackburn DG, Gavelis GS, Anderson KE, Johnson AR, Dunlap KD. Placental

- 224 specializations of the mountain spiny lizard *Sceloporus jarrovi*. J. Morphol.  
225 2010;271:1153–75.
- 226 19. Anderson KE, Blackburn DG, Dunlap KD. Scanning electron microscopy of the  
227 placental interface in the viviparous lizard *Sceloporus jarrovi* (Squamata:  
228 Phrynosomatidae). J. Morphol. 2011;272:465–84.
- 229 20. Griffith OW, Brandley MC, Belov K, Thompson MB. Reptile pregnancy is  
230 underpinned by complex changes in uterine gene expression: A comparative analysis of  
231 the uterine transcriptome in viviparous and oviparous lizards. Genome Biol. Evol.  
232 2016;8:3226–39.
- 233 21. Fisher RE, Geiger LA, Stroik LK, Hutchins ED, George RM, Denardo DF, et al. A  
234 histological comparison of the original and regenerated tail in the green anole, *Anolis*  
235 *carolinensis*. Anat. Rec. (Hoboken). 2012;295:1609–19.
- 236 22. Ritzman TB, Stroik LK, Julik E, Hutchins ED, Lasku E, Denardo DF, et al. The gross  
237 anatomy of the original and regenerated tail in the green anole (*Anolis carolinensis*).  
238 Anat. Rec. (Hoboken). 2012;295:1596–608.
- 239 23. McGaugh SE, Bronikowski AM, Kuo C-H, Reding DM, Addis EA, Flagel LE, et al.  
240 Rapid molecular evolution across amniotes of the IIS/TOR network. Proc. Natl. Acad.  
241 Sci. 2015;112:7055–60.
- 242 24. Bolger AM, Lohse M, Usadel B. Trimmomatic: A flexible trimmer for Illumina  
243 sequence data. Bioinformatics. 2014;30:2114–20.
- 244 25. Grabherr MG, Haas BJ, Yassour M, Levin JZ, Thompson DA, Amit I, et al. Trinity:  
245 reconstructing a full-length transcriptome without a genome from RNA-Seq data. Nat.  
246 Biotechnol. 2013;29:644–52.
- 247 26. Huang X, Chen X-G, Armbruster PA. Comparative performance of transcriptome  
248 assembly methods for non-model organisms. BMC Genomics. BMC Genomics;  
249 2016;17:523.

- 250 27. The UniProt Consortium. UniProt: the universal protein knowledgebase. *Nucleic*  
251 *Acids Res.* 2017;45:158–69.
- 252 28. Finn RD, Coggill P, Eberhardt RY, Eddy SR, Mistry J, Mitchell AL, et al. The Pfam  
253 protein families database: towards a more sustainable future. *Nucleic Acids Res.*  
254 2016;44:279–85.
- 255 29. Langmead B, Salzberg SL. Fast gapped-read alignment with Bowtie 2. *Nat Methods.*  
256 2012;9:357–9.
- 257 30. Simão FA, Waterhouse RM, Ioannidis P, Kriventseva E V., Zdobnov EM. BUSCO:  
258 Assessing genome assembly and annotation completeness with single-copy orthologs.  
259 *Bioinformatics.* 2015;31:3210–2.
- 260 31. Camacho C, Coulouris G, Avagyan V, Ma N, Papadopoulos J, Bealer K, et al.  
261 BLAST+: architecture and applications. *BMC Bioinformatics.* 2009;10:1–9.
- 262 32. Eddy SR. A new generation of homology search tools based on probabilistic  
263 inference. *Genome Inform.* 2009;23:205–11.
- 264 33. Eckalbar WL, Hutchins ED, Markov GJ, Allen AN, Corneveaux JJ, Lindblad-Toh K, et  
265 al. Genome reannotation of the lizard *Anolis carolinensis* based on 14 adult and  
266 embryonic deep transcriptomes. *BMC Genomics.* 2013;14:49.
- 267
- 268
- 269

270 **Figures and tables**

271

272 **Table 1** Number of pairs and accessions numbers for *Sceloporus undulatus*

273 sequence reads.

| <b>Tissue</b>               | <b>Number of read pairs</b> | <b>Accession numbers</b> |
|-----------------------------|-----------------------------|--------------------------|
| <i>This study</i>           |                             |                          |
| Whole Brain                 | 51,537,265                  | SAMN06312741             |
| Embryo                      | 49,112,293                  | SAMN06312742             |
| Skeletal muscle             | 42,922,488                  | SAMN06312743             |
| <i>McGaugh et al., 2015</i> |                             |                          |
| Liver                       | 35,802,423                  | SRR629640                |
| Total                       | 179,374,469                 | —                        |

274

275

276

**Table 2** Statistics for the *de novo* assembly of *Sceloporus undulatus* transcriptome

(Sund\_v1.0).

| <b>Assembly</b>                     | <b>1 tissue [23]</b> | <b>3 tissues</b> | <b>4 tissues<br/>(Sund_v1.0)</b> |
|-------------------------------------|----------------------|------------------|----------------------------------|
| Total of Trinity transcript contigs | 158,323              | 492,249          | 547,370                          |
| Total of Trinity 'genes'            | 138,031              | 422,687          | 467,658                          |
| GC%                                 | 43.8                 | 42.9             | 42.8                             |
| Contig N50 (bp)                     | 1,720                | 1,648            | 1,438                            |
| Contig E90N50 (bp)                  | 2,254                | 2,640            | 2,550                            |
| Average contig length (bp)          | 833.0                | 822.4            | 781.5                            |
| Transcripts with the longest        | 86,630               | 212,172          | 217,756                          |
| ORFs                                | (54.7%)              | (43.1%)          | (39.8%)                          |

277

278 The different assemblies used data from a previous study (1 tissue, liver [23]),  
279 data from this study (3 tissues:: whole brain, skeletal muscle, embryos), and the  
280 two datasets combined (4 tissues, or Sund\_v1.0).

281

282

283 **Table 3** Annotation summary of *Sceloporus undulatus de novo* transcriptome

284 assembly (Sund\_v1.0).

---

| <b>Annotation of the Sund_v1.0 assembly</b> |                 |
|---------------------------------------------|-----------------|
| Annotated genes                             | 467,658         |
| Annotated transcript isoforms               | 547,370         |
| Annotated isoforms/gene                     | 1.17            |
| Transcripts with Swiss-Prot annotation      | (71,944)        |
| Transcripts with PFAM annotation            | 51,018 (46,432) |
| Transcripts with KEGG annotation            | 65,694 (21,520) |
| Transcripts with GO annotation              | 73,936 (66,554) |

---

285

286 Unique annotation numbers are indicated by parentheses.

287 **Table 4** BUSCO results for the transcriptomes of *Sceloporus undulatus* and  
 288 *Anolis carolinensis*.

|                  | <i>Sceloporus undulatus</i> |            |                          | <i>Anolis carolinensis</i> |
|------------------|-----------------------------|------------|--------------------------|----------------------------|
|                  | 1 tissue                    | 3 tissues  | 4 tissues<br>(Sund_v1.0) | 14 tissues                 |
| Complete genes   | 72.5%                       | 91.7%      | 92.3%                    | 96.7%                      |
| Duplicated genes | 25%                         | 43.8%      | 43.9%                    | 37.9%                      |
| Fragmented genes | 9.2%                        | 4.8%       | 4.8%                     | 1.1%                       |
| Missing genes    | 18.3%                       | 3.5%       | 2.9%                     | 2.2%                       |
| Reference        | McGaugh et al, 2015 [23]    | This study | This study               | Eckalbar et al, 2013 [33]  |

289  
 290 For *S. undulatus*, the Sund\_v1.0 assembly includes 4 tissues, specifically 3  
 291 tissues from this study (whole brain, skeletal muscle and embryos) and 1  
 292 previously reported tissue (liver [23]). For *A. carolinensis*, transcriptomes  
 293 included adrenal gland, brain, dewlap skin, embryos, and pooled samples, heart,  
 294 liver, lung, original tail, ovary, regenerating tail tip, regenerating tail base, and  
 295 skeletal muscle [18].

296



297 **Supporting information – Tables**

298

299 **Table S1** Contig length statistics for *Sceloporus undulatus de novo* assemblies.

|                          | <b>1 tissue</b> | <b>3 tissues</b> | <b>4 tissues</b> |
|--------------------------|-----------------|------------------|------------------|
| Minimum length           | 201.0           | 201.0            | 201.0            |
| 1 <sup>st</sup> Quartile | 266.0           | 266.0            | 266.0            |
| Median                   | 382.0           | 377.0            | 375.0            |
| Mean                     | 829.9           | 822.4            | 781.0            |
| 3 <sup>rd</sup> Quartile | 808.0           | 732.0            | 711.0            |
| Maximum length           | 16,776.0        | 30,410.0         | 30,258.0         |

300

301 The Sund\_v1.0 assembly includes 4 tissues, specifically 3 tissues sequenced in  
302 this study (whole brain, skeletal muscle and embryos) and 1 previously reported  
303 tissue (liver [23]).

304

305 **Table S2** Reads mapped to *Sceloporus undulatus de novo* Sund\_v1.0 assembly.

| <b>Read classification</b> | <b>Counts</b> | <b>Percentage of mapped reads</b> |
|----------------------------|---------------|-----------------------------------|
| Proper pairing             | 170,981,981   | 97.10%                            |
| Left read only             | 3,778,790     | 2.15%                             |
| Right read only            | 1,015,874     | 0.58%                             |
| Improper pairing           | 310,142       | 0.18%                             |

306 **Table S3** Representation of full-length reconstructed protein-coding genes in  
307 *Sceloporus undulatus de novo* Sund\_v1.0 transcriptome assembly, using the  
308 protein set of *Anolis carolinensis* (AnoCar2.0, Ensembl) as a reference.

| <b>Alignment</b> | <b>Cumulative</b> |               |
|------------------|-------------------|---------------|
| <b>coverage</b>  | <b>Counts</b>     | <b>counts</b> |
| 100%             | 9,874             | 9,874         |
| 90%              | 1,349             | 11,223        |
| 80%              | 799               | 12,022        |
| 70%              | 757               | 12,779        |
| 60%              | 725               | 13,504        |
| 50%              | 577               | 14,081        |
| 40%              | 463               | 14,544        |
| 30%              | 455               | 14,999        |
| 20%              | 358               | 15,357        |
| 10%              | 97                | 15,454        |

309

310 **Supporting information – Figure**

311 **Figure S1** Contig sizes for different *Sceloporus undulatus* assemblies.

312 Assemblies used (**A**) the previously published single tissue transcriptome (liver  
313 [23]), (**B**) transcriptomes from the 3 tissues sequenced in this study (brain,  
314 skeletal muscle and embryos), and (**C**) the combined data set of 4 tissues ([23]  
315 and this study).

**A**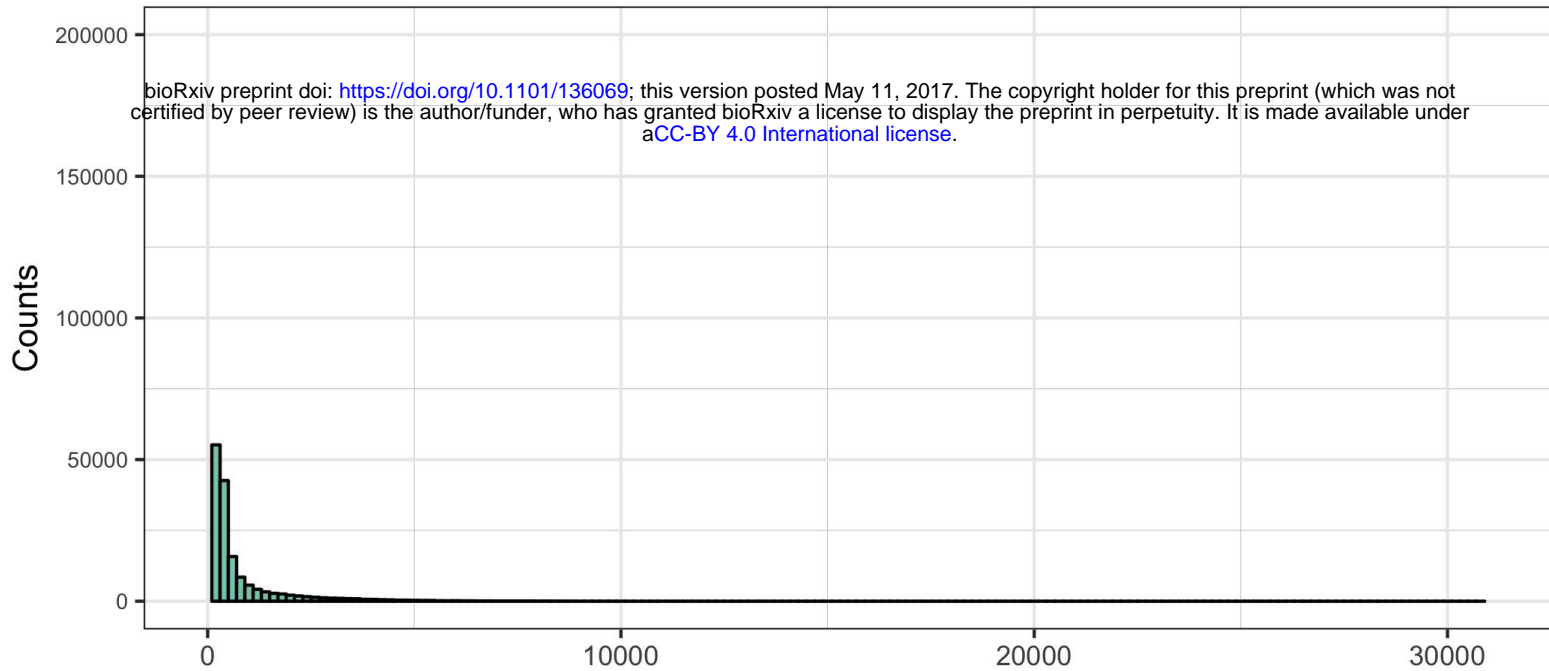**B**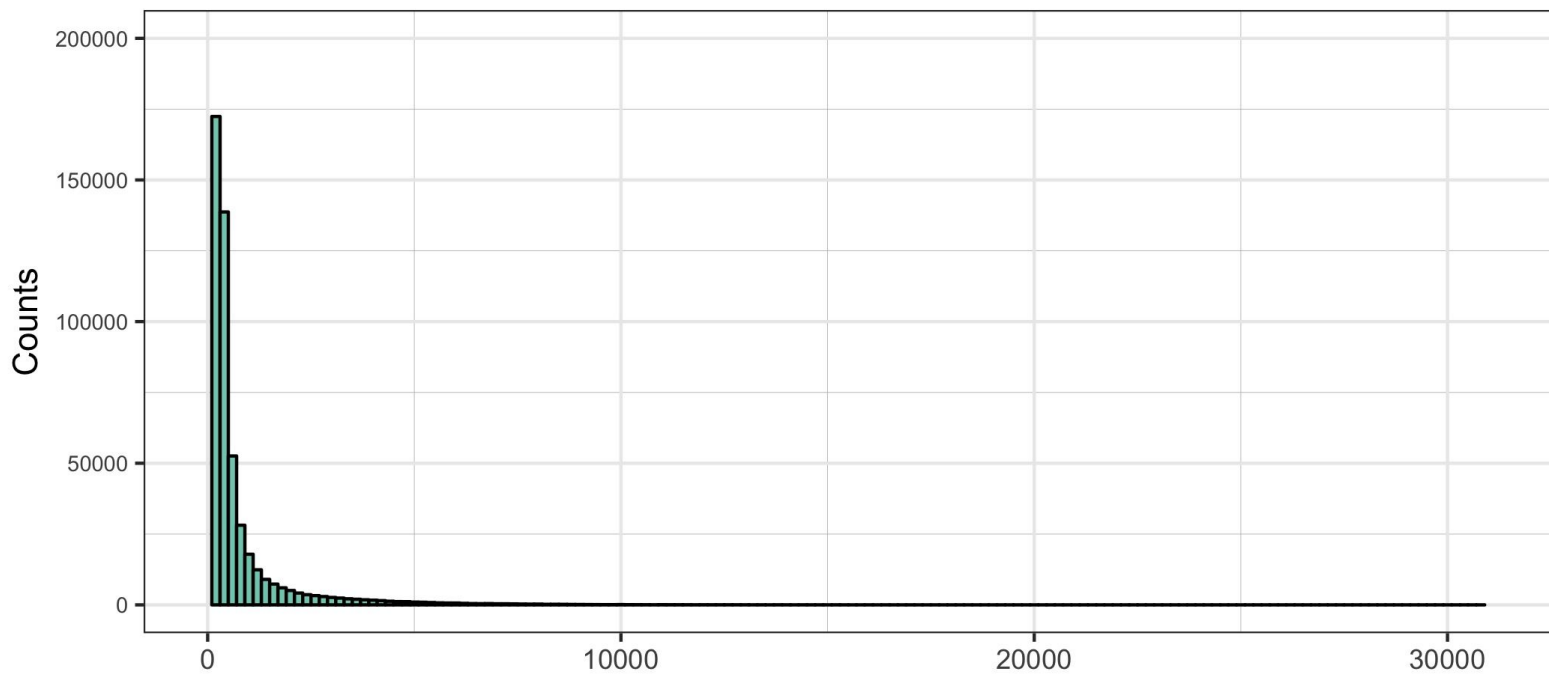**C**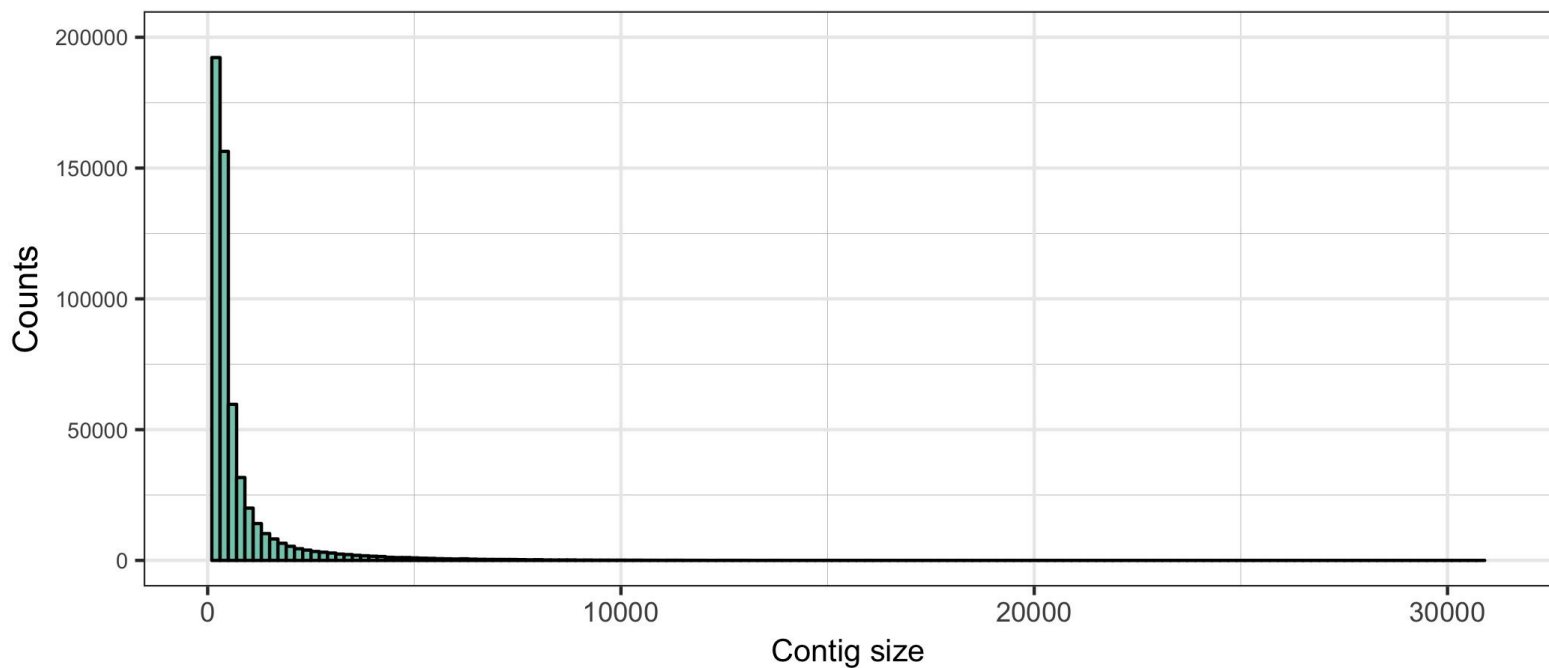

Source: http://www.biorxiv.org/content/10.1101/136069v2.full.pdf
